# Supplementary material
Source: PubMed Central journal article supplement (PMC4587694)
Supplement: ASN.2014070710_ASN2014070710SupplementaryData.pdf [file ASN.2014070710_ASN2014070710SupplementaryData.pdf]

**Supplementary Table 1.** GO biological functions of transcripts modulated in EV- and MSC-CTRL in respect to –Dsh samples. Genes commonly modulated in EV-CTRL and MSC-CTRL in respect to -Dsh were analyzed. Genes with  $\log_2(\text{FC}) \geq 1$  and  $\log_2(\text{FC}) \leq -1$  were respectively considered as up- or down-regulated.

**down -CTRL vs -Dsh**

| <b>Term</b>                         | <b>Count</b> | <b>%</b> | <b>PValue</b> | <b>Genes</b>                                                                |
|-------------------------------------|--------------|----------|---------------|-----------------------------------------------------------------------------|
| ECM-receptor interaction            | 10           | 9,52     | 2,66E-09      | TNC, COL3A1, COL1A2, ITGB4, COL1A1, THBS1, THBS2, COL5A2, COL5A1, FN1       |
| Focal adhesion                      | 11           | 10,48    | 5,06E-07      | TNC, COL3A1, COL1A2, ITGB4, COL1A1, THBS1, FLNC, THBS2, COL5A2, COL5A1, FN1 |
| Complement and coagulation cascades | 3            | 2,86     | 9,17E-02      | C3AR1, C5AR1, F13A1                                                         |

**up -CTRL vs -Dsh**

| <b>Term</b>                                 | <b>Count</b> | <b>%</b> | <b>PValue</b> | <b>Genes</b>                             |
|---------------------------------------------|--------------|----------|---------------|------------------------------------------|
| Butanoate metabolism                        | 6            | 0,35     | 1,19E-04      | ACSM2, ACSM1, OXCT1, ABAT, AACS, ACSM5   |
| Glycine, serine and threonine metabolism    | 5            | 0,29     | 8,11E-04      | ALAS2, DMGDH, AGXT2, GNMT, CBS           |
| Tryptophan metabolism                       | 5            | 0,29     | 1,90E-03      | AADAT, HAAO, ACMSD, KMO, INMT            |
| Alanine, aspartate and glutamate metabolism | 4            | 0,23     | 7,27E-03      | ASS1, ACY3, ABAT, AGXT2                  |
| Primary bile acid biosynthesis              | 3            | 0,18     | 1,67E-02      | CYP7B1, AMACR, AKR1D1                    |
| Drug metabolism                             | 5            | 0,29     | 1,78E-02      | FMO5, FMO2, CYP2A5, CYP2E1, CYP2A4       |
| Complement and coagulation cascades         | 5            | 0,29     | 1,78E-02      | C8A, F13B, SERPINF2, SERPINA1D, SERPINC1 |
| Valine, leucine and isoleucine degradation  | 4            | 0,23     | 2,33E-02      | ALDH6A1, IVD, OXCT1, ABAT                |
| Drug metabolism                             | 4            | 0,23     | 2,61E-02      | UPB1, CYP2A5, UPP2, CYP2A4               |
| Lysine biosynthesis                         | 2            | 0,12     | 2,67E-02      | AADAT, AASS                              |
| beta-Alanine metabolism                     | 3            | 0,18     | 3,45E-02      | CNDP1, UPB1, ABAT                        |
| Tyrosine metabolism                         | 4            | 1,28     | 5,22E-02      | HGD, GSTZ1, HPD, FAH                     |
| Steroid hormone biosynthesis                | 4            | 1,28     | 7,39E-02      | HSD3B2, CYP7B1, AKR1C18, AKR1D1          |
| Selenoamino acid metabolism                 | 3            | 0,96     | 8,85E-02      | CTH, GGT1, CBS                           |

**Supplementary Table 2.** List of the miRNA couples expressed in EV-CTRL and showing a significant statistical correlation with the down-regulated RNA targets in EV-CTRL versus AKI samples. miRNAs expressed in EV-CTRL were clustered into families, according to their seed sequence, and scanned the 3'-UTR of AKI-expressed genes for perfect seed-match occurrences (6-8mers). Genes predicted to be a target of at least two miRNA family were considered ( $p < 0.05$ , Hypergeometric distribution).

| SEED1  | SEED2  | Observed | Expected | P value | mirna_seed1    | mirna_seed2                  |
|--------|--------|----------|----------|---------|----------------|------------------------------|
| AGACGG | GGGUCU | 32       | 796      | 0,015   | hsa-miR-483-5p | hsa-miR-193a-5p              |
| AACGGA | GGCUCA | 31       | 776      | 0,018   | hsa-miR-191    | hsa-miR-24                   |
| AGACGG | CAGUGC | 37       | 972      | 0,021   | hsa-miR-483-5p | hsa-miR-148b<br>hsa-miR-148a |
| AGGAGC | GAGGGG | 100      | 3076     | 0,021   | hsa-miR-28     | hsa-miR-423-5p               |
| GAGGGG | GAGUUG | 65       | 1900     | 0,024   | hsa-miR-423-5p | hsa-miR-571                  |
| AGACGG | GGUAGA | 27       | 684      | 0,030   | hsa-miR-483-5p | mmu-miR-379                  |
| GAGGGG | GGGUCU | 81       | 2470     | 0,031   | hsa-miR-423-5p | hsa-miR-193a-5p              |
| GCGGGG | GGUAGA | 26       | 665      | 0,036   | hsa-miR-744    | mmu-miR-379                  |
| AGACGG | UCCUUG | 33       | 889      | 0,037   | hsa-miR-483-5p | hsa-miR-502                  |
| GAGUUG | GGGUCU | 55       | 1614     | 0,039   | hsa-miR-571    | hsa-miR-193a-5p              |
| AGACGG | AGGUAG | 29       | 766      | 0,040   | hsa-miR-483-5p | hsa-miR-196b                 |
| AACGGA | GGGUCU | 25       | 647      | 0,044   | hsa-miR-191    | hsa-miR-193a-5p              |
| ACCCGU | UGUGCG | 9        | 175      | 0,047   | hsa-miR-99a    | hsa-miR-210                  |
| AGCCCU | GAGGGG | 93       | 2942     | 0,048   | mmu-miR-129-3p | hsa-miR-423-5p               |
| GAGGGG | GCGGGG | 44       | 1273     | 0,05    | hsa-miR-423-5p | hsa-miR-744                  |

**Supplementary Table 3.** GO biological functions of predicted targets of miRNA-EVs. Genes down-regulated in EV-CTRL ( $\log_2(\text{FC}) \leq -1$ , EV-CTRL vs AKI), but not in EV-Dsh treatment in respect to AKI were analyzed. The list of predicted targets was established using as background all genes on the whole Refseq annotation and predicted to be a target of at least two miRNAs.

| <b>Term</b>                                   | <b>Count</b> | <b>%</b>     | <b>PValue</b> | <b>Genes</b>                                          |
|-----------------------------------------------|--------------|--------------|---------------|-------------------------------------------------------|
| <b>ECM-receptor interaction</b>               | 8            | 4,84848<br>5 | 0,000         | SDC1, ITGA5, ITGB4, COL6A1, THBS1, THBS2, COL5A1, FN1 |
| <b>Dilated cardiomyopathy</b>                 | 6            | 3,63636<br>4 | 0,003         | DES, ADCY7, ITGA5, TGFB3, ITGB4, TPM2                 |
| <b>Focal adhesion</b>                         | 8            | 4,84848<br>5 | 0,004         | RAC2, ITGA5, ITGB4, COL6A1, THBS1, THBS2, COL5A1, FN1 |
| <b>Hypertrophic cardiomyopathy (HCM)</b>      | 5            | 3,03030<br>3 | 0,011         | DES, ITGA5, TGFB3, ITGB4, TPM2                        |
| <b>Wnt signaling pathway</b>                  | 6            | 3,63636<br>4 | 0,019         | WNT4, NKD1, NKD2, RAC2, NFATC4, FZD2                  |
| <b>p53 signaling pathway</b>                  | 4            | 2,42424<br>2 | 0,035         | SERPINE1, RPRM, SFN, THBS1                            |
| <b>Chemokine signaling pathway</b>            | 6            | 3,63636<br>4 | 0,041         | CCR5, CXCL14, RAC2, ADCY7, CCL9, CCL4                 |
| <b>Cytokine-cytokine receptor interaction</b> | 7            | 4,24242<br>4 | 0,041         | CCR5, CXCL14, CSF2RB2, TGFB3, CCL9, CCL4, TNFSF8      |
| <b>Complement and coagulation cascades</b>    | 4            | 2,42424<br>2 | 0,043         | C1QA, C5AR1, SERPINE1, F7                             |
| <b>Pathways in cancer</b>                     | 8            | 4,84848<br>5 | 0,050         | WNT4, RAC2, TGFB3, FGF11, BIRC5, FZD2, RUNX1, FN1     |
